# Supplementary material for: A cell abundance analysis based on efficient PAM clustering for a better understanding of the dynamics of endometrial remodelling
Source: PubMed Central journal article supplement (PMC10664584; doi:10.1186/s12859-023-05569-6), 2023-11-22
Supplement: 12859_2023_5569_MOESM2_ESM.pdf [file 12859_2023_5569_MOESM2_ESM.pdf]

# Supplementary Material 2

Domingo, J.; Kutsyr, O.; Leon, T.; Perez, R.; Ayala, G. and Rosón, B.

30/08/2023

## PAM-BS execution time comparison tables

### Varying the number of cells and threads and comparison with package cluster

Table 1 presents the elapsed time in seconds for the entire execution of PAM-BS. This comprises initialization using the BUILD method and optimization until the minimum is obtained.

The individuals (cells) in the subsamples of the total set of cells were randomly selected and the same test sample was used for both packages, *cluster* and *scellpam*.

The cluster package was executed with the `pamonce=5` option, which the manual states as the fastest. This package cannot be applied to a sample size of 71,032 due to the 65,535 cell limit, as shown by the NA in the last row.

Table 1: Time in s for PAM-BS to complete execution.

| Sample size | Package and number of threads |                    |                  |                   |                   |                    |
|-------------|-------------------------------|--------------------|------------------|-------------------|-------------------|--------------------|
|             | cluster<br>serial             | scellpam<br>serial | scellpam<br>8 th | scellpam<br>32 th | scellpam<br>64 th | scellpam<br>128 th |
| 8,879       | 14.2                          | 12.2               | 2.8              | 1.1               | 0.7               | 0.6                |
| 17,758      | 60.7                          | 52.0               | 9.6              | 3.2               | 2.2               | 2.1                |
| 35,516      | 289.8                         | 271.8              | 49.8             | 16.8              | 13.9              | 17.0               |
| 71,032      | NA                            | 1764.8             | 560.6            | 210.6             | 197.1             | 255.2              |

In all cases and for both packages, the execution time increases with the sample size and generally decreases as the number of threads increases, with the exception of 64 and 128 threads. This is due to the fact that the tests were conducted on a machine with 64 cores, and the experiment involving 128 threads utilizes hyperthreading, which does not result in any significant improvement for 8,879 and 17,758 cells, and is even detrimental for 35,516 and 71,032. Hyperthreading is especially advantageous for programs with multiple input/output operations, but it confers no advantages for computationally intensive numerical calculations.

### Varying the number of cells and medoids

Table 2 shows the time in seconds for the complete execution of PAM-BS using *scellpam* with 64 threads. As in the previous case, it includes initialization with the BUILD method and optimization to minimum using the same subsamples.

In this experiment, the number of medoids is tested for a range between 26 and 45.

Table 2: Time in s for the complete execution of PAM-BS with different number of medoids.

| Number of medoids | Sample size |        |        |        |
|-------------------|-------------|--------|--------|--------|
|                   | 8,879       | 17,758 | 35,516 | 71,032 |
| 26                | 0.50        | 1.65   | 11.20  | 158.92 |
| 27                | 0.48        | 1.70   | 11.54  | 163.31 |
| 28                | 0.47        | 1.92   | 11.11  | 168.44 |
| 29                | 0.47        | 1.97   | 11.75  | 172.91 |
| 30                | 0.50        | 2.04   | 11.33  | 182.15 |
| 31                | 0.53        | 2.01   | 12.09  | 191.78 |
| 32                | 0.58        | 2.14   | 12.18  | 196.22 |
| 33                | 0.57        | 2.13   | 12.13  | 201.08 |
| 34                | 0.61        | 2.24   | 12.59  | 210.39 |
| 35                | 0.61        | 2.31   | 13.18  | 215.07 |
| 36                | 0.64        | 2.33   | 13.82  | 210.22 |
| 37                | 0.67        | 2.47   | 14.32  | 205.58 |
| 38                | 0.68        | 2.53   | 14.47  | 219.67 |
| 39                | 0.67        | 2.68   | 15.14  | 239.07 |
| 40                | 0.68        | 2.75   | 15.13  | 238.74 |
| 41                | 0.70        | 2.80   | 15.77  | 248.13 |
| 42                | 0.70        | 2.88   | 15.59  | 248.25 |
| 43                | 0.72        | 2.84   | 15.70  | 252.85 |
| 44                | 0.75        | 2.89   | 15.72  | 252.71 |
| 45                | 0.76        | 3.03   | 15.74  | 252.16 |

The time required for execution typically rises with the number of medoids, although this is not always true. The total time is determined by the number of iterations executed in the optimization phase and, as a result, is reliant on the starting medoids: a greater number of medoids may lead to a faster convergence by grouping the samples more tightly. As expected, the execution time increases in relation to sample size due to the larger loop limits in the algorithm.
