# Supplementary material for: A cell abundance analysis based on efficient PAM clustering for a better understanding of the dynamics of endometrial remodelling
Source: PubMed Central journal article supplement (PMC10664584; doi:10.1186/s12859-023-05569-6), 2023-11-22
Supplement: 12859_2023_5569_MOESM4_ESM.pdf [file 12859_2023_5569_MOESM4_ESM.pdf]

# Supplementary Material 4

Domingo, J.; Kutsyr, O.; León, T.; Perez, R.; Ayala, G. and Rosón, B.

2023-11-13

## Table of contents

|                                                     |    |
|-----------------------------------------------------|----|
| Packages . . . . .                                  | 1  |
| Functions . . . . .                                 | 1  |
| Predictors . . . . .                                | 7  |
| Differential abundance . . . . .                    | 7  |
| Differential abundance with filtering . . . . .     | 17 |
| Plots . . . . .                                     | 21 |
| Multidimensional scaling over the medoids . . . . . | 28 |

## Packages

Loading packages needed later Maechler et al. (2022), Wickham et al. (2022).

```
pacman::p_load(scellpam, cluster, edgeR, ggplot2, ggfortify,  
              knitr, kableExtra)
```

## Functions

Some functions needed later. The function `DA()` performs a differential abundance analysis using the likelihood and the quasi-likelihood approaches proposed in McCarthy, Chen, and Smyth (2012) and Lund et al. (2012) respectively.

```
## Differential abundance  
## @description  
## Differential abundance  
## @param abundance Abundance matrix  
## @param model_matrix Model matrix to analyzed
```

```

#' @export
DA = function(abundance, model_matrix) {
  ## edgeR con GLM
  dge = edgeR::DGEList(counts = abundance)
  dge = estimateDisp(dge, design = model_matrix)
  ## edgeR with likelihood
  fit = glmFit(dge, design = model_matrix)
  ## edgeR with quasi-likelihood
  qlfit = glmQLFit(dge, design = model_matrix)
  list(abundance = abundance,
       fit = fit,
       qlfit = qlfit)
}

```

The following function `postDA()` analyzes the results obtained using the previous function `DA()`. It permits to test null coefficients or contrasts. The argument `filtering` provides the option to work instead of with the whole set of cells with the cells remaining after the filtering of those cells with low values of the silhouette.

```

#' Analysis of DA results
#' @description
#' Analysis of DA results
#' @param hd Directory with DA outputs
#' @param filenames File names with the abundance matrices
#' @param dfilenames File with the description of \code{filenames}
#' @param model_matrix Model matrix of the linear model fitted
#' @param alpha False discovery rate
#' @param coefficient Coefficient(s) to be tested as null(s)
#' @param contrast Contrasts to evaluate
#' @param filtering Is there pruning using the silhouette?
postDA = function(hd,
                 filenames = paste0(hd, "names.txt"),
                 dfilenames = paste0(hd, "dnames.csv"),
                 model_matrix,
                 alpha = 0.05,
                 coefficient = NULL,
                 contrast = NULL,
                 filtering = FALSE) {
  res1 = res2 = sig1 = sig2 = NULL
  name0 = read.csv(filenames, header = FALSE)
  dname0 = read.table(dfilenames, sep = ";")
  abm = vector("list", nrow(name0))
}

```

```

names(abm) = name0[, 1]
for (i in 1:nrow(name0)) {
  load(paste0(hd, name0[i, 1]))
  if (filtering)
    abm[[i]] = DA(abundance = AbMfin, model_matrix = model_matrix)
  else
    abm[[i]] = DA(abundance = AbMini, model_matrix = model_matrix)
}

if (!is.null(coefficient)) {
  res1 = matrix(NA, nrow = length(abm), ncol = 4 + 2)
  res1 = as.data.frame(res1)
  names(res1) = c("db",
                 "normalization",
                 "ngenes",
                 "diss",
                 "sig.glm",
                 "sig.ql")
  sig1 = vector("list", length(abm))
  for (i in 1:length(abm)) {
    lrt1 = glmLRT(abm[[i]]$fit, coef = coefficient)
    a = topTags(lrt1, sort.by = "none", n = 100)
    p1 = a$table$PValue
    Ftest1 = glmQLFTest(abm[[i]]$qlfit, coef = coefficient)
    a = topTags(Ftest1, sort.by = "none", n = 100)[, "PValue"]
    p2 = a$table$PValue
    res1[i, 1:4] = dname0[i, 1:4]
    res1[i, 5] = sum(p.adjust(p1, method = "BH") <= alpha)
    res1[i, 6] = sum(p.adjust(p2, method = "BH") <= alpha)
    sig1[[i]] = which(p.adjust(p1, method = "BH") <= alpha)
    sig2[[i]] = which(p.adjust(p2, method = "BH") <= alpha)
    names(sig1[i]) = names(sig2[i]) = names(abm)[i]
  }
  res1$sig.glm = as.numeric(res1$sig.glm)
  res1$sig.ql = as.numeric(res1$sig.ql)
}

if (!is.null(contrast)) {
  res2 = matrix(NA,
               nrow = length(abm),
               ncol = 4 + 2 * ncol(contrast))
  res2 = as.data.frame(res2)
}

```

```

names(res2) = c(
  "db",
  "normalization",
  "ngenes",
  "diss",
  paste0("sig.glm", 1:ncol(contrast)),
  paste0("sig.ql", 1:ncol(contrast))
)

for (i in 1:length(abm)) {
  p1 = matrix(NA,
              nrow = nrow(abm[[i]]$abundance),
              ncol = ncol(contrast))
  for (j in 1:ncol(contrast)) {
    lrt1 = glmLRT(abm[[i]]$fit, contrast = contrast[, j])
    a = topTags(lrt1, sort.by = "none", n = 100)
    p1[, j] = a$table$PValue
  }
  p2 = matrix(NA,
              nrow = nrow(abm[[i]]$abundance),
              ncol = ncol(contrast))
  for (j in 1:ncol(contrast)) {
    lrt1 = glmQLFTest(abm[[i]]$qlfit, contrast = contrast[, j])
    a = topTags(lrt1, sort.by = "none", n = 100)
    p2[, j] = a$table$PValue
  }
  res2[i, 1:4] = dname0[i, 1:4]
  p11 = apply(p1, 2, function(y)
             sum(p.adjust(y, method = "BH") <= alpha))
  p22 = apply(p2, 2, function(y)
             sum(p.adjust(y, method = "BH") <= alpha))
  res2[i, 5:7] = p11
  res2[i, 8:10] = p22
}
}
list(
  abm = abm,
  res1 = res1,
  sig1 = sig1,
  res2 = res2
)

```

```
}
```

The following function `postDA2()` analyzes the results obtained using the previous function `DA()`. It permits to test null coefficients or contrasts.

```
 #' Analysis of DA results
 #' @description
 #' Analysis of DA results
 #' @param filenames File names with the abundance matrices
 #' @param model_matrix Model matrix of the linear model fitted
 #' @param alpha False discovery rate
 #' @param coefficient Coefficient(s) to be tested as null(s)
 #' @param contrast Contrasts to evaluate
postDA2 = function(filenames,
                   model_matrix,
                   alpha = 0.05,
                   coefficient = NULL,
                   contrast = NULL) {
  res1 = res2 = sig1 = sig2 = NULL
  for (i in 1:length(filenames)) {
    load(filenames[i])
    abm = vector("list", length(ab))
    for (j in 1:length(ab))
      abm[[j]] = DA(abundance = ab[[j]]$abundance,
                   model_matrix = model_matrix)
  }

  if (!is.null(coefficient)) {
    res1 = matrix(NA, nrow = length(abm), ncol = length(ab[[1]]$pdata) + 2)
    sig1 = vector("list", length(abm))
    for (i in 1:length(abm)) {
      lrt1 = glmLRT(abm[[i]]$fit, coef = coefficient)
      a = topTags(lrt1, sort.by = "none", n = 100)
      p1 = a$table$PValue
      Ftest1 = glmQLFTest(abm[[i]]$qlfit, coef = coefficient)
      a = topTags(Ftest1, sort.by = "none", n = 100)[, "PValue"]
      p2 = a$table$PValue
      ff = ab[[i]]$pdata
      res1[i, ] = c(ff,
                   sum(p.adjust(p1, method = "BH") <= alpha),
                   sum(p.adjust(p2, method = "BH") <= alpha))
    }
  }
}
```

```

sig1[[i]] = list(pdata = ff, sig = which(p.adjust(p1, method = "BH") <=
                                     alpha))
sig2[[i]] = list(pdata = ff, sig = which(p.adjust(p2, method = "BH") <=
                                     alpha))
names(sig1[i]) = names(sig2[i]) = names(abm)[i]
}
res1 = as.data.frame(res1)
names(res1) = c("diss",
               "normalization",
               "ngenes",
               "state",
               "nsig.glm",
               "nsig.ql")
res1$nsig.glm = as.numeric(res1$nsig.glm)
res1$nsig.ql = as.numeric(res1$nsig.ql)
}
if (!is.null(contrast)) {
  res2 = matrix(NA,
               nrow = length(abm),
               ncol = length(ab[[1]]$pdata) + 2 * ncol(contrast))
  for (i in 1:length(abm)) {
    p1 = matrix(NA,
               nrow = nrow(abm[[i]]$abundance),
               ncol = ncol(contrast))
    for (j in 1:ncol(contrast)) {
      lrt1 = glmLRT(abm[[i]]$fit, contrast = contrast[, j])
      a = topTags(lrt1, sort.by = "none", n = 100)
      p1[, j] = a$table$PValue
    }
    p2 = matrix(NA,
               nrow = nrow(abm[[i]]$abundance),
               ncol = ncol(contrast))
    for (j in 1:ncol(contrast)) {
      lrt1 = glmQLFTest(abm[[i]]$qlfit, contrast = contrast[, j])
      a = topTags(lrt1, sort.by = "none", n = 100)
      p2[, j] = a$table$PValue
    }
    ff = ab[[i]]$pdata
    p11 = apply(p1, 2, function(y)
               sum(p.adjust(y, method = "BH") <= alpha))
  }
}

```

```

    p22 = apply(p2, 2, function(y)
      sum(p.adjust(y, method = "BH") <= alpha))
    res2[i, ] = c(ff, p11, p22)
  }
res2 = as.data.frame(res2)
res2[, (length(ab[[1]]$pdata) + 1):ncol(res2)] =
  sapply(res2[, (length(ab[[1]]$pdata) + 1):ncol(res2)], as.numeric)
names(res2) = c(
  "diss",
  "normalization",
  "ngenes",
  "state",
  paste0("sig.glm", 1:ncol(contrast)),
  paste0("sig.q1", 1:ncol(contrast))
)
## sig2
}
list(
  abm = abm,
  res1 = res1,
  sig1 = sig1,
  res2 = res2
)
}

```

## Predictors

Let us define the predictors used later: - `time` is the day of the menstrual cycle. - `time2` is binary variable indicating if the `time` is lesser or equal to the day 20 (0) or greater than 20 (1). The predictor `phase` is just the phase of the menstrual cycle. We will analyze each predictor separately.

```

time = c(17, 22, 22, 20, 23, 19, 24, 20, 26, 16)
time2 = cut(time, breaks = c(-Inf, 20, +Inf))
phase = factor(c(3, 4, 4, 4, 4, 4, 5, 4, 5, 3))

```

## Differential abundance

This section contains the differential abundance analyses with the whole set of cells.

Set the directory where to find the abundance matrices.

```
dirAbundanceMatrices =  
  "/home/gag/Nextcloud/GSE111976/data/ABUNDANCE_MATRICES/"
```

The following chunk will do the differential abundance analyses for two different normalizations (see details in the paper), different predictors (`time`, `time2` and `phase`) and different tests. The null hypothesis of a null coefficient is tested for the numeric variable `time` and the binary factor `time2`. If the predictor considered is the `phase` then the contrasts comparing each pair of levels of this variable are considered. Two different testing procedures are considered, the likelihood and the quasi-likelihood approaches proposed in McCarthy, Chen, and Smyth (2012) and Lund et al. (2012) respectively.

`time`

Differential abundance analyses with `time` predictor for two raw and log normalization:

```
model_matrix = model.matrix( ~ time)  
df = postDA(  
  hd = paste0(dirAbundanceMatrices, "ABM_NRAW/"),  
  model_matrix = model_matrix,  
  alpha = 0.05,  
  coefficient = 2  
)
```

```
df$res1 # Table 1  
## df$sig1
```

```
save(df, file = paste0(  
  paste0(dirAbundanceMatrices, "ABM_NRAW"),  
  "_results_time.rda"  
)
```

```
df = postDA(  
  hd = paste0(dirAbundanceMatrices, "ABM_NLOG/"),  
  model_matrix = model_matrix,  
  alpha = 0.05,  
  coefficient = 2  
)
```



Table 1: The results correspond to model with predictor ‘time’. Number of significant clusters using the likelihood approach (sig.glm) and quasi-likelihood (sig.ql) for database of study (db), ‘raw’ normalization method (normalization), number of HVG (ngenes) and metric/dissimilarity (diss).

| db   | normalization | ngenes | diss | sig.glm | sig.ql |
|------|---------------|--------|------|---------|--------|
| Wang | rawn          | 100    | L1   | 2       | 2      |
| Wang | rawn          | 100    | L2   | 4       | 4      |
| Wang | rawn          | 100    | Pe   | 2       | 2      |
| Wang | rawn          | 500    | L1   | 2       | 0      |
| Wang | rawn          | 500    | L2   | 2       | 0      |
| Wang | rawn          | 500    | Pe   | 2       | 0      |
| Wang | rawn          | 1000   | L1   | 2       | 0      |
| Wang | rawn          | 1000   | L2   | 0       | 0      |
| Wang | rawn          | 1000   | Pe   | 0       | 0      |
| Wang | rawn          | 2000   | L1   | 0       | 0      |
| Wang | rawn          | 2000   | L2   | 2       | 0      |
| Wang | rawn          | 2000   | Pe   | 0       | 0      |
| Wang | rawn          | 3000   | L1   | 0       | 0      |
| Wang | rawn          | 3000   | L2   | 2       | 0      |
| Wang | rawn          | 3000   | Pe   | 0       | 0      |
| Wang | rawn          | 4000   | L1   | 0       | 0      |
| Wang | rawn          | 4000   | L2   | 2       | 0      |
| Wang | rawn          | 4000   | Pe   | 0       | 0      |
| Wang | rawn          | 5000   | L1   | 0       | 0      |
| Wang | rawn          | 5000   | L2   | 2       | 0      |
| Wang | rawn          | 5000   | Pe   | 0       | 0      |
| Wang | rawn          | 20000  | L1   | 0       | 0      |
| Wang | rawn          | 20000  | L2   | 0       | 0      |
| Wang | rawn          | 20000  | Pe   | 0       | 0      |

```
df$res1 # Table 2
## df$sig1
```

```
save(df, file = paste0(
  paste0(dirAbundanceMatrices, "ABM_NLOG"),
  "_results_time.rda"
))
```

**time2**

Differential abundance analyses with **time2** predictor for two raw and log normalization:

Table 2: The results correspond to model with predictor ‘time’. Number of significant clusters using the likelihood approach (sig.glm) and quasi-likelihood (sig.ql) for database of study (db), ‘log’ normalization method (normalization), number of HVG (ngenes) and metric/dissimilarity (diss).

| db   | normalization | ngenes | diss | sig.glm | sig.ql |
|------|---------------|--------|------|---------|--------|
| Wang | lg1n          | 100    | L1   | 0       | 0      |
| Wang | lg1n          | 100    | L2   | 1       | 0      |
| Wang | lg1n          | 100    | Pe   | 0       | 0      |
| Wang | lg1n          | 500    | L1   | 0       | 0      |
| Wang | lg1n          | 500    | L2   | 0       | 0      |
| Wang | lg1n          | 500    | Pe   | 0       | 0      |
| Wang | lg1n          | 1000   | L1   | 1       | 0      |
| Wang | lg1n          | 1000   | L2   | 0       | 0      |
| Wang | lg1n          | 1000   | Pe   | 0       | 0      |
| Wang | lg1n          | 2000   | L1   | 0       | 0      |
| Wang | lg1n          | 2000   | L2   | 0       | 0      |
| Wang | lg1n          | 2000   | Pe   | 0       | 0      |
| Wang | lg1n          | 3000   | L1   | 0       | 0      |
| Wang | lg1n          | 3000   | L2   | 0       | 0      |
| Wang | lg1n          | 3000   | Pe   | 0       | 0      |
| Wang | lg1n          | 4000   | L1   | 0       | 0      |
| Wang | lg1n          | 4000   | L2   | 0       | 0      |
| Wang | lg1n          | 4000   | Pe   | 0       | 0      |
| Wang | lg1n          | 5000   | L1   | 0       | 0      |
| Wang | lg1n          | 5000   | L2   | 0       | 0      |
| Wang | lg1n          | 5000   | Pe   | 0       | 0      |
| Wang | lg1n          | 20000  | L1   | 0       | 0      |
| Wang | lg1n          | 20000  | L2   | 0       | 0      |
| Wang | lg1n          | 20000  | Pe   | 0       | 0      |

```

model_matrix = model.matrix( ~ time2)
df = postDA(
  hd = paste0(dirAbundanceMatrices, "ABM_NRAW/"),
  model_matrix = model_matrix,
  alpha = 0.05,
  coefficient = 2
)

```

```

df$res1 # Table 3
## df$sig1

```

```

save(df, file = paste0(
  paste0(dirAbundanceMatrices, "ABM_NRAW"),

```

Table 3: The results correspond to model with predictor ‘time2’. Number of significant clusters using the likelihood approach (sig.glm) and quasi-likelihood (sig.ql) for database of study (db), ‘raw’ normalization method (normalization), number of HVG (ngenes) and metric/dissimilarity (diss).

| db   | normalization | ngenes | diss | sig.glm | sig.ql |
|------|---------------|--------|------|---------|--------|
| Wang | rawn          | 100    | L1   | 9       | 0      |
| Wang | rawn          | 100    | L2   | 9       | 0      |
| Wang | rawn          | 100    | Pe   | 3       | 0      |
| Wang | rawn          | 500    | L1   | 5       | 0      |
| Wang | rawn          | 500    | L2   | 5       | 0      |
| Wang | rawn          | 500    | Pe   | 0       | 0      |
| Wang | rawn          | 1000   | L1   | 0       | 0      |
| Wang | rawn          | 1000   | L2   | 3       | 0      |
| Wang | rawn          | 1000   | Pe   | 3       | 0      |
| Wang | rawn          | 2000   | L1   | 0       | 0      |
| Wang | rawn          | 2000   | L2   | 5       | 0      |
| Wang | rawn          | 2000   | Pe   | 0       | 0      |
| Wang | rawn          | 3000   | L1   | 0       | 0      |
| Wang | rawn          | 3000   | L2   | 5       | 0      |
| Wang | rawn          | 3000   | Pe   | 1       | 0      |
| Wang | rawn          | 4000   | L1   | 0       | 0      |
| Wang | rawn          | 4000   | L2   | 5       | 0      |
| Wang | rawn          | 4000   | Pe   | 1       | 0      |
| Wang | rawn          | 5000   | L1   | 0       | 0      |
| Wang | rawn          | 5000   | L2   | 5       | 0      |
| Wang | rawn          | 5000   | Pe   | 1       | 0      |
| Wang | rawn          | 20000  | L1   | 0       | 0      |
| Wang | rawn          | 20000  | L2   | 1       | 0      |
| Wang | rawn          | 20000  | Pe   | 0       | 0      |

```

    "_results_time2.rda"
  ))

df = postDA(
  hd = paste0(dirAbundanceMatrices, "ABM_NLOG/"),
  model_matrix = model_matrix,
  alpha = 0.05,
  coefficient = 2
)

df$res1 # Table 4
## df$sig1

```

Table 4: The results correspond to model with predictor ‘time2’. Number of significant clusters using the likelihood approach (sig.glm) and quasi-likelihood (sig.ql) for database of study (db), ‘log’ normalization method (normalization), number of HVG (ngenes) and metric/dissimilarity (diss).

| db   | normalization | ngenes | diss | sig.glm | sig.ql |
|------|---------------|--------|------|---------|--------|
| Wang | lg1n          | 100    | L1   | 6       | 0      |
| Wang | lg1n          | 100    | L2   | 7       | 1      |
| Wang | lg1n          | 100    | Pe   | 5       | 0      |
| Wang | lg1n          | 500    | L1   | 2       | 1      |
| Wang | lg1n          | 500    | L2   | 1       | 0      |
| Wang | lg1n          | 500    | Pe   | 0       | 0      |
| Wang | lg1n          | 1000   | L1   | 0       | 0      |
| Wang | lg1n          | 1000   | L2   | 0       | 0      |
| Wang | lg1n          | 1000   | Pe   | 0       | 0      |
| Wang | lg1n          | 2000   | L1   | 0       | 0      |
| Wang | lg1n          | 2000   | L2   | 0       | 0      |
| Wang | lg1n          | 2000   | Pe   | 0       | 0      |
| Wang | lg1n          | 3000   | L1   | 0       | 0      |
| Wang | lg1n          | 3000   | L2   | 7       | 0      |
| Wang | lg1n          | 3000   | Pe   | 0       | 0      |
| Wang | lg1n          | 4000   | L1   | 0       | 0      |
| Wang | lg1n          | 4000   | L2   | 4       | 0      |
| Wang | lg1n          | 4000   | Pe   | 0       | 0      |
| Wang | lg1n          | 5000   | L1   | 0       | 0      |
| Wang | lg1n          | 5000   | L2   | 0       | 0      |
| Wang | lg1n          | 5000   | Pe   | 0       | 0      |
| Wang | lg1n          | 20000  | L1   | 0       | 0      |
| Wang | lg1n          | 20000  | L2   | 0       | 0      |
| Wang | lg1n          | 20000  | Pe   | 0       | 0      |

```
save(df, file = paste0(
  paste0(dirAbundanceMatrices, "ABM_NLOG"),
  "_results_time2.rda"
))
```

## phase

Differential abundance analyses with phase predictor for two raw and log normalization:

```
model_matrix = model.matrix( ~ 0 + phase)
df = postDA(
  hd = paste0(dirAbundanceMatrices, "ABM_NRAW/"),
  model_matrix = model_matrix,
```

```

alpha = 0.05,
coefficient = 2:3
)

```

```

df$res1 # Table 5
## df$sig1

```

Table 5: The results correspond to model with predictor ‘phase’. Number of significant clusters using the likelihood approach (sig.glm) and quasi-likelihood (sig.ql) for database of study (db), ‘raw’ normalization method (normalization), number of HVG (ngenes) and metric/dissimilarity (diss).

| db   | normalization | ngenes | diss | sig.glm | sig.ql |
|------|---------------|--------|------|---------|--------|
| Wang | rawn          | 100    | L1   | 28      | 5      |
| Wang | rawn          | 100    | L2   | 27      | 4      |
| Wang | rawn          | 100    | Pe   | 27      | 22     |
| Wang | rawn          | 500    | L1   | 29      | 23     |
| Wang | rawn          | 500    | L2   | 30      | 29     |
| Wang | rawn          | 500    | Pe   | 30      | 28     |
| Wang | rawn          | 1000   | L1   | 30      | 21     |
| Wang | rawn          | 1000   | L2   | 30      | 29     |
| Wang | rawn          | 1000   | Pe   | 30      | 27     |
| Wang | rawn          | 2000   | L1   | 30      | 26     |
| Wang | rawn          | 2000   | L2   | 30      | 29     |
| Wang | rawn          | 2000   | Pe   | 29      | 27     |
| Wang | rawn          | 3000   | L1   | 30      | 27     |
| Wang | rawn          | 3000   | L2   | 30      | 29     |
| Wang | rawn          | 3000   | Pe   | 29      | 27     |
| Wang | rawn          | 4000   | L1   | 30      | 27     |
| Wang | rawn          | 4000   | L2   | 30      | 29     |
| Wang | rawn          | 4000   | Pe   | 30      | 28     |
| Wang | rawn          | 5000   | L1   | 29      | 24     |
| Wang | rawn          | 5000   | L2   | 30      | 29     |
| Wang | rawn          | 5000   | Pe   | 29      | 26     |
| Wang | rawn          | 20000  | L1   | 30      | 29     |
| Wang | rawn          | 20000  | L2   | 29      | 27     |
| Wang | rawn          | 20000  | Pe   | 30      | 28     |

```

save(df,
      file = paste0(dirAbundanceMatrices, "ABM_NRAW",
                    "_results_phase1.rda"))

```

```

contrast = makeContrasts(
  c1 = phase3 - phase4,

```

```

c2 = phase3 - phase5,
c3 = phase4 - phase5,
levels = model_matrix
)
df = postDA(
  hd = paste0(dirAbundanceMatrices, "ABM_NRAW/"),
  model_matrix = model_matrix,
  alpha = 0.05,
  contrast = contrast
)

```

df\$res2 # Table 6

Table 6: The results correspond to model with predictor ‘phase’ and tests the different contrasts comparing each pair of phases. Number of significant clusters using the likelihood approach (sig.glm1-3) and quasi-likelihood (sig.ql1-3) for database of study (db), ‘raw’ normalization method (normalization), number of HVG (ngenes) and metric/dissimilarity (diss).

| db   | normalization | ngenes | diss | sig.glm1 | sig.glm2 | sig.glm3 | sig.ql1 | sig.ql2 | sig.ql3 |
|------|---------------|--------|------|----------|----------|----------|---------|---------|---------|
| Wang | rawn          | 100    | L1   | 0        | 0        | 2        | 0       | 0       | 1       |
| Wang | rawn          | 100    | L2   | 0        | 0        | 5        | 0       | 0       | 0       |
| Wang | rawn          | 100    | Pe   | 0        | 0        | 0        | 0       | 0       | 0       |
| Wang | rawn          | 500    | L1   | 0        | 0        | 2        | 0       | 0       | 0       |
| Wang | rawn          | 500    | L2   | 0        | 0        | 2        | 0       | 0       | 0       |
| Wang | rawn          | 500    | Pe   | 0        | 0        | 0        | 0       | 0       | 0       |
| Wang | rawn          | 1000   | L1   | 0        | 0        | 4        | 0       | 0       | 0       |
| Wang | rawn          | 1000   | L2   | 0        | 0        | 3        | 0       | 0       | 0       |
| Wang | rawn          | 1000   | Pe   | 0        | 0        | 0        | 0       | 0       | 0       |
| Wang | rawn          | 2000   | L1   | 0        | 0        | 2        | 0       | 0       | 2       |
| Wang | rawn          | 2000   | L2   | 0        | 0        | 2        | 0       | 0       | 0       |
| Wang | rawn          | 2000   | Pe   | 0        | 0        | 0        | 0       | 0       | 0       |
| Wang | rawn          | 3000   | L1   | 0        | 0        | 1        | 0       | 0       | 0       |
| Wang | rawn          | 3000   | L2   | 0        | 0        | 6        | 0       | 0       | 0       |
| Wang | rawn          | 3000   | Pe   | 0        | 0        | 0        | 0       | 0       | 0       |
| Wang | rawn          | 4000   | L1   | 0        | 0        | 1        | 0       | 0       | 1       |
| Wang | rawn          | 4000   | L2   | 0        | 0        | 6        | 0       | 0       | 0       |
| Wang | rawn          | 4000   | Pe   | 0        | 0        | 0        | 0       | 0       | 0       |
| Wang | rawn          | 5000   | L1   | 0        | 0        | 1        | 0       | 0       | 1       |
| Wang | rawn          | 5000   | L2   | 0        | 0        | 5        | 0       | 0       | 0       |
| Wang | rawn          | 5000   | Pe   | 0        | 0        | 0        | 0       | 0       | 0       |
| Wang | rawn          | 20000  | L1   | 0        | 0        | 2        | 0       | 0       | 2       |
| Wang | rawn          | 20000  | L2   | 0        | 0        | 1        | 0       | 0       | 0       |
| Wang | rawn          | 20000  | Pe   | 0        | 0        | 0        | 0       | 0       | 0       |

```

save(df, file = paste0(
  paste0(dirAbundanceMatrices, "ABM_NRAW"),
  "_results_phase2.rda"
))

df = postDA(
  hd = paste0(dirAbundanceMatrices, "ABM_NLOG/"),
  model_matrix = model_matrix,
  alpha = 0.05,
  coefficient = 2:3
)

df$res1 # Table 7

```

Table 7: The results correspond to model with predictor ‘phase’. Number of significant clusters using the likelihood approach (sig.glm) and quasi-likelihood (sig.ql) for database of study (db), ‘log’ normalization method (normalization), number of HVG (ngenes) and metric/dissimilarity (diss).

| db   | normalization | ngenes | diss | sig.glm | sig.ql |
|------|---------------|--------|------|---------|--------|
| Wang | lg1n          | 100    | L1   | 28      | 14     |
| Wang | lg1n          | 100    | L2   | 28      | 17     |
| Wang | lg1n          | 100    | Pe   | 29      | 12     |
| Wang | lg1n          | 500    | L1   | 29      | 13     |
| Wang | lg1n          | 500    | L2   | 27      | 14     |
| Wang | lg1n          | 500    | Pe   | 29      | 12     |
| Wang | lg1n          | 1000   | L1   | 29      | 18     |
| Wang | lg1n          | 1000   | L2   | 26      | 10     |
| Wang | lg1n          | 1000   | Pe   | 28      | 4      |
| Wang | lg1n          | 2000   | L1   | 30      | 16     |
| Wang | lg1n          | 2000   | L2   | 29      | 21     |
| Wang | lg1n          | 2000   | Pe   | 25      | 1      |
| Wang | lg1n          | 3000   | L1   | 30      | 17     |
| Wang | lg1n          | 3000   | L2   | 29      | 26     |
| Wang | lg1n          | 3000   | Pe   | 27      | 9      |
| Wang | lg1n          | 4000   | L1   | 30      | 18     |
| Wang | lg1n          | 4000   | L2   | 30      | 26     |
| Wang | lg1n          | 4000   | Pe   | 29      | 24     |
| Wang | lg1n          | 5000   | L1   | 30      | 18     |
| Wang | lg1n          | 5000   | L2   | 30      | 22     |
| Wang | lg1n          | 5000   | Pe   | 28      | 23     |
| Wang | lg1n          | 20000  | L1   | 30      | 28     |
| Wang | lg1n          | 20000  | L2   | 29      | 19     |
| Wang | lg1n          | 20000  | Pe   | 30      | 24     |

```

save(df,
      file = paste0(dirAbundanceMatrices, "ABM_NLOG",
                    "_results_phase1.rda"))

df = postDA(
  hd = paste0(dirAbundanceMatrices, "ABM_NLOG/"),
  model_matrix = model_matrix,
  alpha = 0.05,
  contrast = contrast
)

df$res2 # Table 8

```

Table 8: The results correspond to model with predictor ‘phase’ and tests the different contrasts comparing each pair of phases. Number of significant clusters using the likelihood approach (sig.glm1-3) and quasi-likelihood (sig.q11-3) for database of study (db), ‘log’ normalization method (normalization), number of HVG (ngenes) and metric/dissimilarity (diss).

| db   | normalization | ngenes | diss | sig.glm1 | sig.glm2 | sig.glm3 | sig.q11 | sig.q12 | sig.q13 |
|------|---------------|--------|------|----------|----------|----------|---------|---------|---------|
| Wang | lg1n          | 100    | L1   | 0        | 0        | 0        | 0       | 0       | 0       |
| Wang | lg1n          | 100    | L2   | 0        | 0        | 0        | 0       | 0       | 0       |
| Wang | lg1n          | 100    | Pe   | 0        | 0        | 0        | 0       | 0       | 0       |
| Wang | lg1n          | 500    | L1   | 0        | 0        | 0        | 0       | 0       | 0       |
| Wang | lg1n          | 500    | L2   | 0        | 0        | 0        | 0       | 0       | 0       |
| Wang | lg1n          | 500    | Pe   | 0        | 0        | 0        | 0       | 0       | 0       |
| Wang | lg1n          | 1000   | L1   | 0        | 0        | 2        | 0       | 0       | 0       |
| Wang | lg1n          | 1000   | L2   | 0        | 0        | 0        | 0       | 0       | 0       |
| Wang | lg1n          | 1000   | Pe   | 0        | 0        | 0        | 0       | 0       | 0       |
| Wang | lg1n          | 2000   | L1   | 0        | 0        | 0        | 0       | 0       | 0       |
| Wang | lg1n          | 2000   | L2   | 0        | 0        | 0        | 0       | 0       | 0       |
| Wang | lg1n          | 2000   | Pe   | 0        | 0        | 0        | 0       | 0       | 0       |
| Wang | lg1n          | 3000   | L1   | 0        | 0        | 0        | 0       | 0       | 0       |
| Wang | lg1n          | 3000   | L2   | 0        | 0        | 0        | 0       | 0       | 0       |
| Wang | lg1n          | 3000   | Pe   | 0        | 0        | 0        | 0       | 0       | 0       |
| Wang | lg1n          | 4000   | L1   | 0        | 0        | 0        | 0       | 0       | 0       |
| Wang | lg1n          | 4000   | L2   | 0        | 0        | 0        | 0       | 0       | 0       |
| Wang | lg1n          | 4000   | Pe   | 0        | 0        | 0        | 0       | 0       | 0       |
| Wang | lg1n          | 5000   | L1   | 0        | 0        | 0        | 0       | 0       | 0       |
| Wang | lg1n          | 5000   | L2   | 0        | 0        | 0        | 0       | 0       | 0       |
| Wang | lg1n          | 5000   | Pe   | 0        | 0        | 0        | 0       | 0       | 0       |
| Wang | lg1n          | 20000  | L1   | 0        | 0        | 0        | 0       | 0       | 0       |
| Wang | lg1n          | 20000  | L2   | 0        | 0        | 0        | 0       | 0       | 0       |
| Wang | lg1n          | 20000  | Pe   | 0        | 0        | 0        | 0       | 0       | 0       |



```

save(df, file = paste0(
  paste0(dirAbundanceMatrices, "ABM_NLOG"),
  "_results_phase2.rda"
))

```

## Differential abundance with filtering

This section contains the differential abundance analyses with a filtered set of cells. In particular, cells with a low silhouette are removed from the analysis.

**time**

Differential abundance analyses with **time** predictor for **raw** normalization:

```

model_matrix = model.matrix( ~ time)
df = postDA(
  hd = paste0(dirAbundanceMatrices, "ABM_NRAW_FILT_SIL/"),
  model_matrix = model_matrix,
  alpha = 0.05,
  coefficient = 2,
  filtering = TRUE
)

```

```

df$res1 # Table 9
## df$sig1

```

Table 9: The results correspond to model with predictor ‘time’ with filtered set. Number of significant clusters using the likelihood approach (sig.glm) and quasi-likelihood (sig.ql) for database of study (db), ‘raw’ normalization method (normalization), number of HVG (ngenes) and metric/dissimilarity (diss).

| db   | normalization | ngenes | diss | sig.glm | sig.ql |
|------|---------------|--------|------|---------|--------|
| Wang | rawn          | 100    | L2   | 4       | 5      |
| Wang | rawn          | 500    | L2   | 4       | 0      |
| Wang | rawn          | 1000   | L2   | 2       | 0      |
| Wang | rawn          | 2000   | L2   | 3       | 3      |
| Wang | rawn          | 3000   | L2   | 2       | 0      |
| Wang | rawn          | 4000   | L2   | 2       | 0      |
| Wang | rawn          | 5000   | L2   | 2       | 1      |
| Wang | rawn          | 20000  | L2   | 0       | 0      |

```

save(df, file = paste0(
  paste0(dirAbundanceMatrices, "ABM_NRAW_FILT_SIL"),
  "_results_time.rda"
))

```

`time2`

Differential abundance analyses with `time` predictor for raw normalization:

```

model_matrix = model.matrix( ~ time2)
df = postDA(
  hd = paste0(dirAbundanceMatrices, "ABM_NRAW_FILT_SIL/"),
  model_matrix = model_matrix,
  alpha = 0.05,
  coefficient = 2,
  filtering = TRUE
)

```

```

df$res1 # Table 10
## df$sig1

```

Table 10: The results correspond to model with predictor ‘time2’ with filtered set. Number of significant clusters using the likelihood approach (`sig.glm`) and quasi-likelihood (`sig.ql`) for database of study (`db`), ‘raw’ normalization method (`normalization`), number of HVG (`ngenes`) and metric/dissimilarity (`diss`).

| db   | normalization | ngenes | diss | sig.glm | sig.ql |
|------|---------------|--------|------|---------|--------|
| Wang | rawn          | 100    | L2   | 10      | 0      |
| Wang | rawn          | 500    | L2   | 8       | 1      |
| Wang | rawn          | 1000   | L2   | 7       | 0      |
| Wang | rawn          | 2000   | L2   | 6       | 0      |
| Wang | rawn          | 3000   | L2   | 2       | 0      |
| Wang | rawn          | 4000   | L2   | 6       | 0      |
| Wang | rawn          | 5000   | L2   | 5       | 0      |
| Wang | rawn          | 20000  | L2   | 1       | 0      |

```

save(df,
  file = paste0(
    dirAbundanceMatrices,
    "ABM_NRAW_FILT_SIL",
    "_results_time2.rda"
  )
)

```

```
))
```

## phase

Differential abundance analyses with phase predictor for raw normalization:

```
model_matrix = model.matrix( ~ phase)
df = postDA(
  hd = paste0(dirAbundanceMatrices, "ABM_NRAW_FILT_SIL/"),
  model_matrix = model_matrix,
  alpha = 0.05,
  coefficient = 2:3,
  filtering = TRUE
)
```

```
df$res1 # Table 11
## df$sig1
```

Table 11: The results correspond to model with predictor ‘phase’ with filtered set. Number of significant clusters using the likelihood approach (sig.glm) and quasi-likelihood (sig.ql) for database of study (db), ‘raw’ normalization method (normalization), number of HVG (ngenes) and metric/dissimilarity (diss).

| db   | normalization | ngenes | diss | sig.glm | sig.ql |
|------|---------------|--------|------|---------|--------|
| Wang | rawn          | 100    | L2   | 5       | 0      |
| Wang | rawn          | 500    | L2   | 3       | 0      |
| Wang | rawn          | 1000   | L2   | 2       | 0      |
| Wang | rawn          | 2000   | L2   | 7       | 2      |
| Wang | rawn          | 3000   | L2   | 8       | 1      |
| Wang | rawn          | 4000   | L2   | 6       | 1      |
| Wang | rawn          | 5000   | L2   | 6       | 1      |
| Wang | rawn          | 20000  | L2   | 3       | 0      |

```
save(df,
  file = paste0(
    dirAbundanceMatrices,
    "ABM_NRAW_FILT_SIL",
    "_results_phase1.rda"
  ))
```

```

model_matrix = model.matrix( ~ 0 + phase)
contrast = makeContrasts(
  c1 = phase3 - phase4,
  c2 = phase3 - phase5,
  c3 = phase4 - phase5,
  levels = model_matrix
)
df = postDA(
  hd = paste0(dirAbundanceMatrices, "ABM_NRAW_FILT_SIL/"),
  model_matrix = model_matrix,
  alpha = 0.05,
  contrast = contrast
)

```

```
df$res2 # Table 12
```

Table 12: The results correspond to model with predictor ‘phase’ with filtered set and tests the different contrasts comparing each pair of phases. Number of significant clusters using the likelihood approach (sig.glm1-3) and quasi-likelihood (sig.q11-3) for database of study (db), ‘raw’ normalization method (normalization), number of HVG (ngenes) and metric/dissimilarity (diss).

| db   | normalization | ngenes | diss | sig.glm1 | sig.glm2 | sig.glm3 | sig.q11 | sig.q12 | sig.q13 |
|------|---------------|--------|------|----------|----------|----------|---------|---------|---------|
| Wang | rawn          | 100    | L2   | 0        | 0        | 5        | 0       | 0       | 0       |
| Wang | rawn          | 500    | L2   | 0        | 0        | 2        | 0       | 0       | 0       |
| Wang | rawn          | 1000   | L2   | 0        | 0        | 3        | 0       | 0       | 0       |
| Wang | rawn          | 2000   | L2   | 0        | 0        | 2        | 0       | 0       | 0       |
| Wang | rawn          | 3000   | L2   | 0        | 0        | 6        | 0       | 0       | 0       |
| Wang | rawn          | 4000   | L2   | 0        | 0        | 6        | 0       | 0       | 0       |
| Wang | rawn          | 5000   | L2   | 0        | 0        | 5        | 0       | 0       | 0       |
| Wang | rawn          | 20000  | L2   | 0        | 0        | 1        | 0       | 0       | 0       |

```

save(df,
  file = paste0(
    dirAbundanceMatrices,
    "ABM_NRAW_FILT_SIL",
    "_results_phase.rda"
  ))

```

## Plots

The following plot shows the number of significant clusters using the raw normalization for different number of previously chosen genes.

First, we analyze `time2`.

```
load(paste0(dirAbundanceMatrices, "ABM_NRAW", "_results_time2.rda"))
df1 = matrix(NA, nrow = 24, ncol = 7)
df1 = as.data.frame(df1)
df1[1:24, 1:6] = df$res1
df1[1:24, 7] = rep("time2", 24)
names(df1) = c(names(df$res1), "predictor")
View(df1)
df1$diss = factor(df1$diss)
df1$predictor = factor(df1$predictor)
p = ggplot(df1, aes(x = ngenes, y = sig.glm, color = diss)) + geom_point()
p = p + facet_grid(. ~ predictor)
p = p + xlab("Number of genes") + ylab("Number of significant clusters") +
  theme(
    panel.grid.major = element_blank(),
    panel.grid.minor = element_blank(),
    panel.background = element_blank(),
    axis.line = element_line(colour = "black")
  )
ggsave("SigClust_nraw_time2.png", p)
```

Saving 5.5 x 3.5 in image

Now, we compare the results with `time` and `time2`.

```
load(paste0(dirAbundanceMatrices, "ABM_NRAW", "_results_time.rda"))
df1 = matrix(NA, nrow = 48, ncol = 7)
df1 = as.data.frame(df1)
df1[1:24, 1:6] = df$res1
df1[1:24, 7] = rep("time", 24)

load(paste0(dirAbundanceMatrices, "ABM_NRAW", "_results_time2.rda"))
df1[25:48, 1:6] = df$res1
df1[25:48, 7] = rep("time2", 24)
names(df1) = c(names(df$res1), "predictor")
View(df1)
```

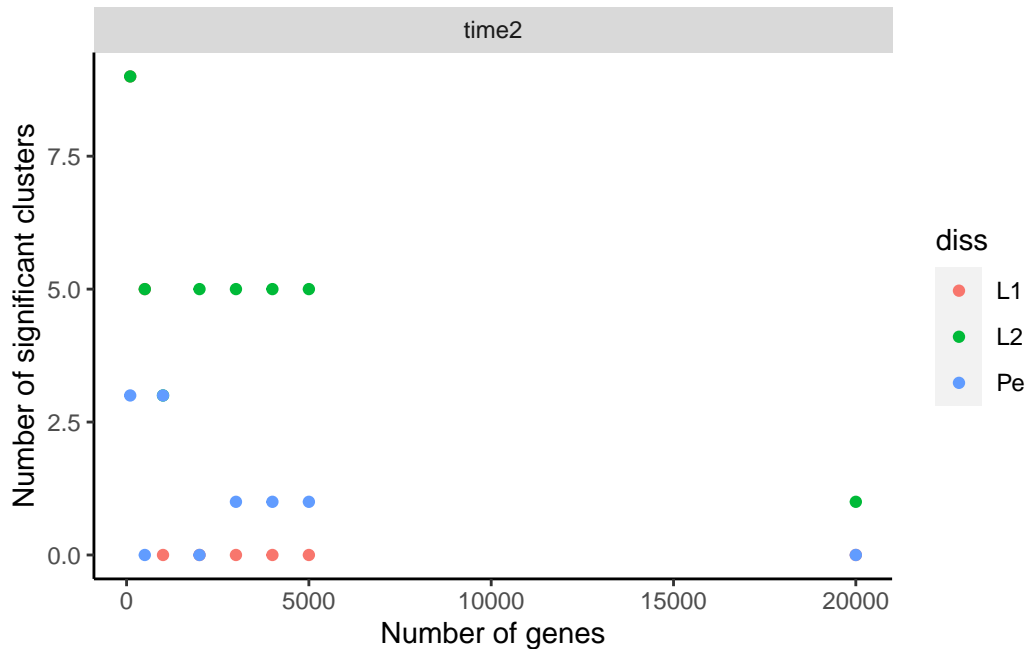

Figure 1: Number of significant clusters using the raw normalization with `time2` predictor.

```
df1$diss = factor(df1$diss)
df1$predictor = factor(df1$predictor)
p = ggplot(df1, aes(x = ngenes, y = sig.glm, color = diss)) + geom_point()
p = p + facet_grid(. ~ predictor)
p = p + xlab("Number of genes") + ylab("Number of significant clusters") +
  theme(
    panel.grid.major = element_blank(),
    panel.grid.minor = element_blank(),
    panel.background = element_blank(),
    axis.line = element_line(colour = "black")
  )
ggsave("SigClust_nraw_time.png", p)
```

Saving 5.5 x 3.5 in image

The following plot shows the number of significant clusters using filtered cell sets where the predictors `time` and `time2` are compared for the Euclidean metric.

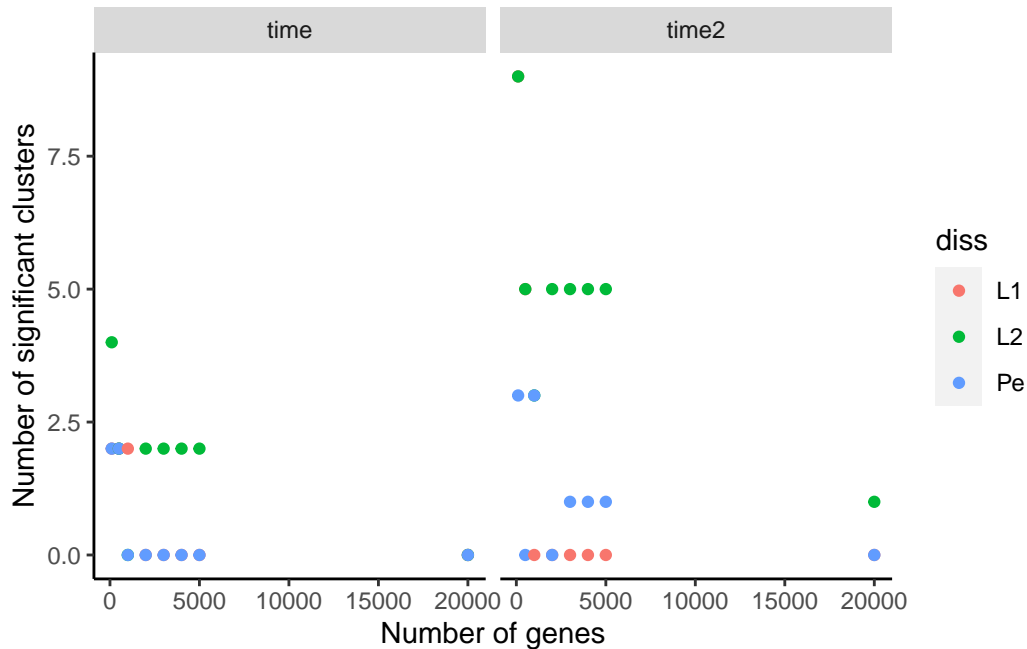

Figure 2: Number of significant clusters using the raw normalization comparing the results with `time` and `time2` predictors.

```
load(paste0(
  dirAbundanceMatrices,
  "ABM_NRAW_FILT_SIL",
  "_results_time2.rda"
))
df1 = matrix(NA, nrow = 8, ncol = 7)
df1 = as.data.frame(df1)
df1[1:8, 1:6] = df$res1
df1[1:8, 7] = rep("time2", 8)

names(df1) = c(names(df$res1), "type")
View(df1)

df1$type = factor(df1$type)
p = ggplot(df1, aes(x = ngenes, y = sig.glm, color = type)) + geom_point()
p = p + xlab("Number of genes") + ylab("Number of significant clusters") +
  theme(
    panel.grid.major = element_blank(),
    panel.grid.minor = element_blank(),
```

```

    panel.background = element_blank(),
    axis.line = element_line(colour = "black")
  )
  ggsave("SigClust_nraw_time_filtering.png", p)

```

Saving 5.5 x 3.5 in image

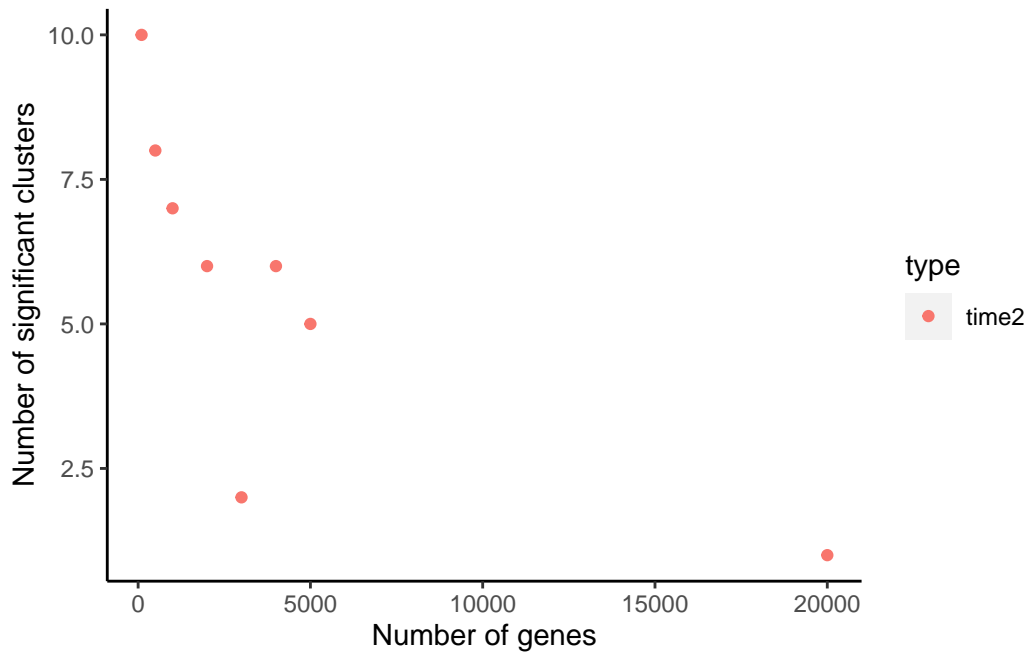

Figure 3: Number of significant clusters using filtered cell sets where the predictors `time` and `time2` are compared for the Euclidean metric.

Now we compare the results with and without filtering.

```

load(paste0(dirAbundanceMatrices, "ABM_NRAW", "_results_time2.rda"))
df1 = matrix(NA, nrow = 16, ncol = 8)
df1 = as.data.frame(df1)
df1[1:8, 1:6] = df$res1[df$res1$diss == "L2", ]
df1[1:8, 7] = rep("time2", 8)
df1[1:8, 8] = rep("without", 8)

load(paste0(
  dirAbundanceMatrices,

```



```

    "ABM_NRAW_FILT_SIL",
    "_results_time2.rda"
  ))
df1[9:16, 1:6] = df$res1
df1[9:16, 7] = rep("time2", 8)
df1[9:16, 8] = rep("with", 8)

names(df1) = c(names(df$res1), "type", "filtering")

df1$type = factor(df1$type)
df1$filtering = factor(df1$filtering)

p = ggplot(df1, aes(x = ngenes, y = sig.glm, color = filtering)) + geom_point()
p = p + facet_grid(. ~ type)
p = p + xlab("Number of genes") + ylab("Number of significant clusters") +
  theme(
    panel.grid.major = element_blank(),
    panel.grid.minor = element_blank(),
    panel.background = element_blank(),
    axis.line = element_line(colour = "black")
  )
ggsave("SigClust_nraw_L2_filtering_time2.png", p)

```

Saving 5.5 x 3.5 in image

```

load(paste0(dirAbundanceMatrices, "ABM_NRAW", "_results_time.rda"))
df1 = matrix(NA, nrow = 32, ncol = 8)
df1 = as.data.frame(df1)
df1[1:8, 1:6] = df$res1[df$res1$diss == "L2", ]
df1[1:8, 7] = rep("time", 8)
df1[1:8, 8] = rep("without", 8)

load(paste0(dirAbundanceMatrices, "ABM_NRAW", "_results_time2.rda"))
df1[9:16, 1:6] = df$res1[df$res1$diss == "L2", ]
df1[9:16, 7] = rep("time2", 8)
df1[9:16, 8] = rep("without", 8)

load(paste0(
  dirAbundanceMatrices,
  "ABM_NRAW_FILT_SIL",
  "_results_time.rda"

```

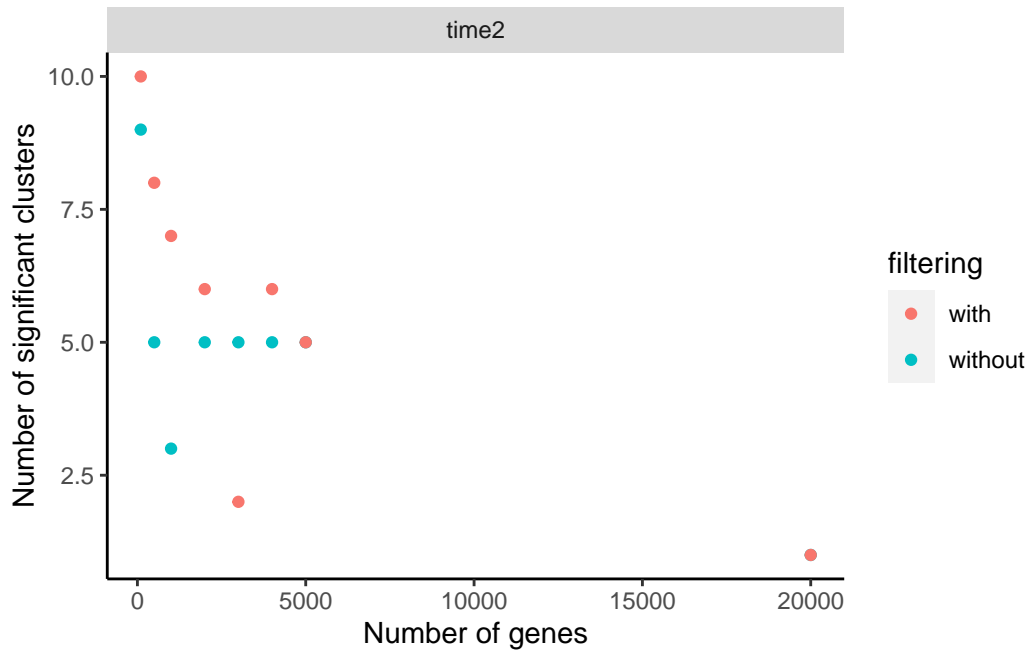

Figure 4: Number of significant clusters using the predictor `time2`, where the results with and without filtering cell sets are compared for the Euclidean metric.

```

))
df1[17:24, 1:6] = df$res1
df1[17:24, 7] = rep("time", 8)
df1[17:24, 8] = rep("with", 8)

load(paste0(
  dirAbundanceMatrices,
  "ABM_NRAW_FILT_SIL",
  "_results_time2.rda"
))
df1[25:32, 1:6] = df$res1
df1[25:32, 7] = rep("time2", 8)
df1[25:32, 8] = rep("with", 8)

names(df1) = c(names(df$res1), "type", "filtering")

df1$type = factor(df1$type)
df1$filtering = factor(df1$filtering)

```

```

p = ggplot(df1, aes(x = ngenes, y = sig.glm, color = filtering)) + geom_point()
p = p + facet_grid(. ~ type)
p = p + xlab("Number of genes") + ylab("Number of significant clusters") +
  theme(
    panel.grid.major = element_blank(),
    panel.grid.minor = element_blank(),
    panel.background = element_blank(),
    axis.line = element_line(colour = "black")
  )
ggsave("SigClust_nraw_L2_filtering.png", p)

```

Saving 5.5 x 3.5 in image

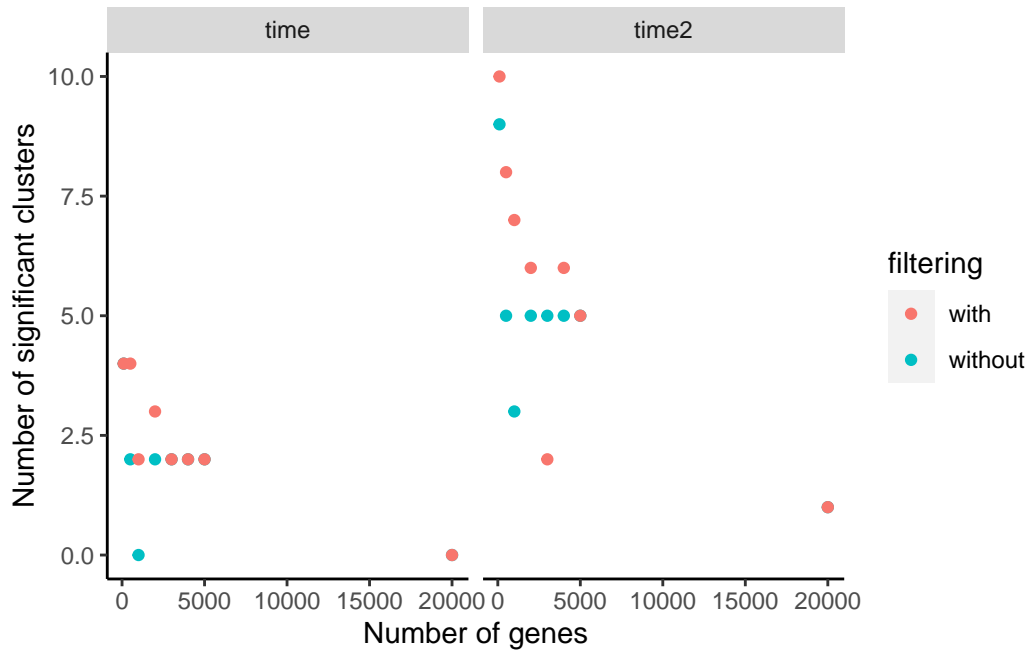

Figure 5: Number of significant clusters using filtered (with) and unfiltered (without) cell sets where the predictors `time` and `time2` are compared for the Euclidean metric.

## Multidimensional scaling over the medoids

```
finput1 = "../../../BinaryData/COUNT_MATRICES/Wang_lg1n_f0100.bin"
finput2 = "../../../RESULTS_PAM_CLUSTERING/Wang_lg1n_f0100_Pe.rda"
load(finput2)
load("Supl/c.10x_metadata.RData")
CoordMed = GetJManyRows(finput1, L$med)
med.clas = L$clasif[which(is.element(names(L$clasif), rownames(CoordMed)))]
xy = cmdscale(dist(CoordMed))
xy = data.frame(xy, med.clas)
names(xy) = c("x", "y", "class")
type = metadata[match(rownames(xy), rownames(metadata)), "cell_type"]
xy = data.frame(xy, type)
p = ggplot(xy, aes(x = x, y = y, color = type)) + geom_point() +
  theme(panel.background = element_rect(fill = "white"),
        axis.line = element_line(colour = "black")) +
  scale_color_manual(
    values = c(
      "#8DD3C7",
      "#FFFFB3",
      "#BEBADA",
      "#80B1D3",
      "#FDB462",
      "#B3DE69",
      "#FCCDE5",
      "#D9D9D9"
    )
  )
ggsave("Wang_lg1n_f0100_mds.png", p)
```

Lund, Steven P., Dan Nettleton, Davis J. McCarthy, and Gordon K. Smyth. 2012. "Detecting Differential Expression in RNA-Sequence Data Using Quasi-Likelihood with Shrunken Dispersion Estimates." *Statistical Applications in Genetics and Molecular Biology* 11 (5). <https://doi.org/doi:10.1515/1544-6115.1826>.

Maechler, Martin, Peter Rousseeuw, Anja Struyf, and Mia Hubert. 2022. *Cluster: "Finding Groups in Data": Cluster Analysis Extended Rousseeuw Et Al.* <https://svn.r-project.org/R-packages/trunk/cluster/>.

McCarthy, Davis J., Yunshun Chen, and Gordon K. Smyth. 2012. "Differential Expression Analysis of Multifactor RNA-Seq Experiments with Respect to Biological Variation." *Nucleic Acids Research* 40 (10): 4288–97. <https://doi.org/10.1093/nar/gks042>.

Wickham, Hadley, Winston Chang, Lionel Henry, Thomas Lin Pedersen, Kohske Takahashi, Claus Wilke, Kara Woo, Hiroaki Yutani, and Dewey Dunnington. 2022. *Ggplot2: Create*

*Elegant Data Visualisations Using the Grammar of Graphics.* <https://CRAN.R-project.org/package=ggplot2>.
